# Supplementary material for: CUL4B promotes bladder cancer metastasis and induces epithelial-to-mesenchymal transition by activating the Wnt/β-catenin signaling pathway
Source: PubMed Central journal article supplement (PMC5652777; doi:10.18632/oncotarget.20455), 2017-08-24
Supplement: oncotarget-08-77241-s001.pdf [file oncotarget-08-77241-s001.pdf]

## CUL4B promotes bladder cancer metastasis and induces epithelial-to-mesenchymal transition by activating the Wnt/ $\beta$ -catenin signaling pathway

### SUPPLEMENTARY MATERIALS

Supplementary Table 1: Primer sequences of qRT-PCR

| Gene             | Primer sequence (5' - 3')                                                         |
|------------------|-----------------------------------------------------------------------------------|
| CUL4B            | Forward: 5'-TGCTGCTCAGGAGGTCAGATC-3'<br>Reserse: 5'-TGGAAATCAAAGTCTTCTCTCTCGTT-3' |
| cyclinD1         | Forward: 5'-GCCCTCGGTGTCCTACTTC-3'<br>Reserse: 5'-CTCCTCCTCGCACTTCTGTT-3'         |
| $\beta$ -catenin | Forward: 5'-GCCAGTGGATTCCGTAATGT-3'<br>Reserse: 5'-GAGCTTGCTTTCTGATTGC-3'         |
| GSK3 $\beta$     | Forward: 5'-GACGCTCCCTGTGATTIATGC-3'<br>Reserse: 5'-GTTAGTCGGGCAGTTGGTGTAT-3'     |
| c-myc            | Forward: 5'-TTCGGGTAGTGGAAAACCAG-3'<br>Reserse: 5'-CAGCAGCTCGAATTTCTTCC-3'        |
| MMP7             | Forward: 5'-AGATGTGGAGTGCCAGATGT-3'<br>Reserse: 5'-TAGACTGCTACCATCCGTCC-3'        |
| E-cadherin       | Forward: 5'-AAGGCACGCCTGTCGAAGCA-3'<br>Reserse: 5'-ACGTTGTCCCGGTGTCATCCT-3'       |
| N- cadherin      | Forward: 5'-TGCGCGTGAAGGTTTGCCAGT-3'<br>Reserse: 5'-TGGCGTTCTTTATCCCGGCGT-3'      |
| Vimentin         | Forward: 5'-ACCGCACACAGCAAGGCGAT-3'<br>Reserse: 5'-CGATTGAGGGCTCCTAGCGGTT-3'      |
| ZEB1             | Forward: 5'-ACCTCTTACAGGTTGCTCCT-3'<br>Reserse :5'-AGTGCAGGAGCTGAGAGTCA-3'        |
| ZEB2             | Forward: 5'-AAATGCACAGAGTGTGGCAAGG-3'<br>Reserse: 5'-CTGCTGATGTGCGAACTGTAGGA-3'   |
| Snail            | Forward: 5'-ACCACTATGCCGCGCTCTT-3'<br>Reserse: 5'-GGTCGTAGGGCTGCTGGAA-3'          |
| GAPDH            | Forward: 5'-AACGGATTTGGTTCGTATTGGG-3'<br>Reserse: 5'-TCGCTCCTGGAAGATGGTGAT-3'     |

qRT-PCR, quantitative real-time polymerase chain reaction.
